# Supplementary material
Source: PubMed Central journal article supplement (PMC3718106)
Supplement: 1222044110_pnas.201222044SI.pdf [file 1222044110_pnas.201222044SI.pdf]

# Supporting Information

Gomes et al. 10.1073/pnas.1222044110

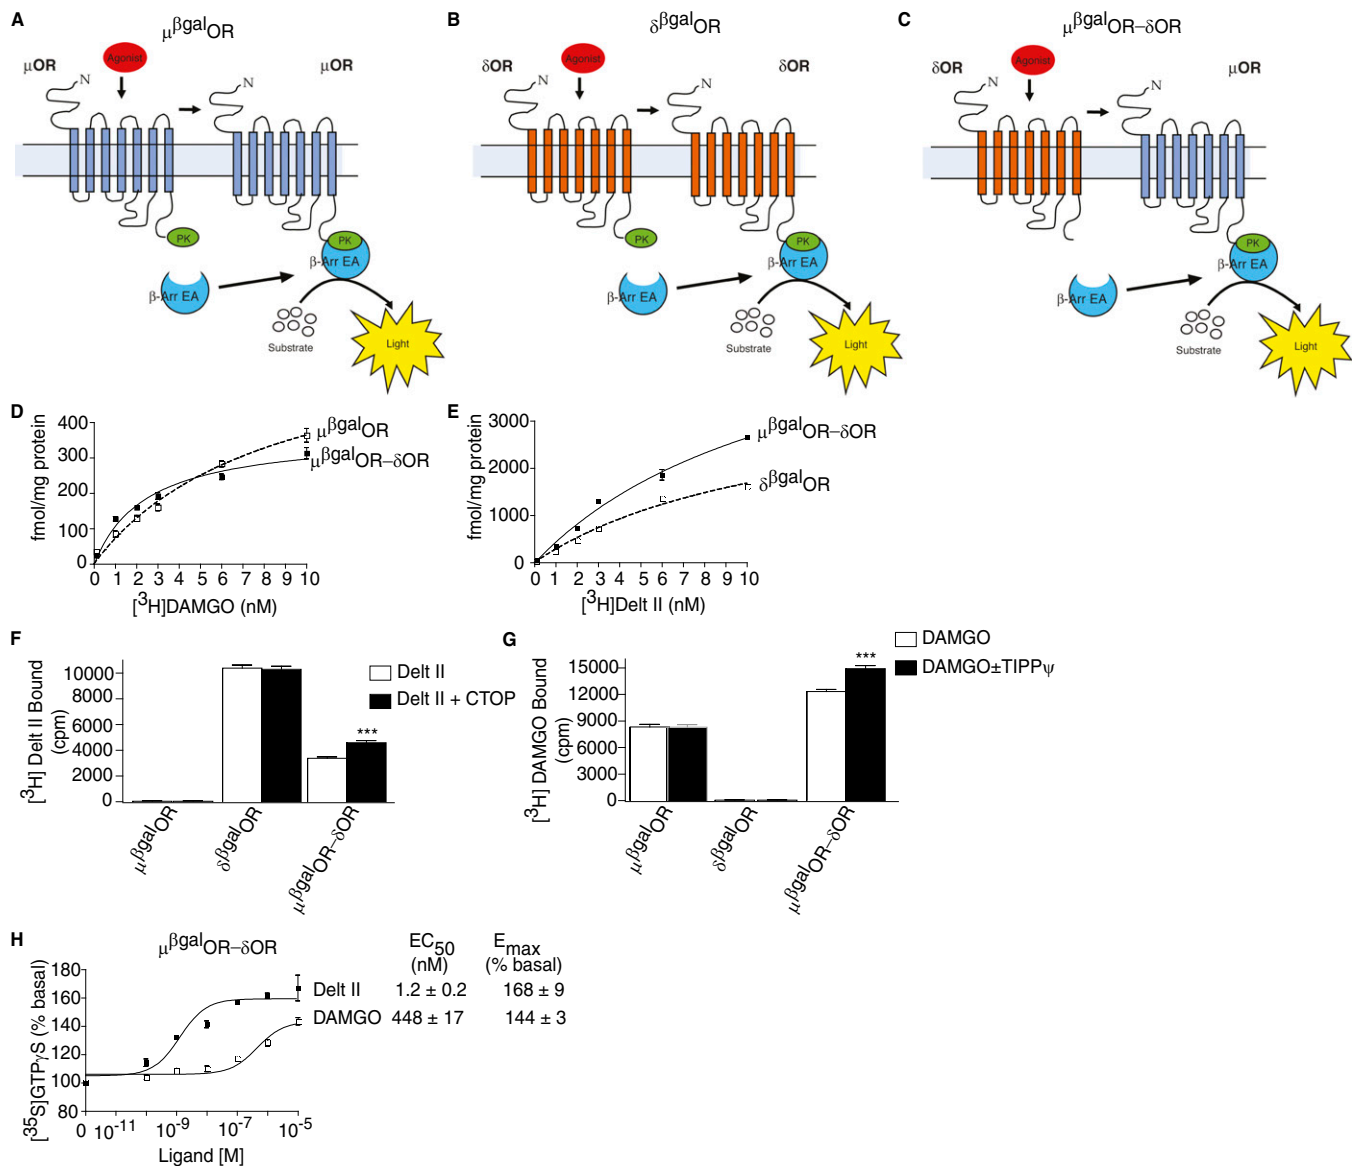

**Fig. S1.** Characterization of cells expressing  $\mu^{\beta\text{gal}}$ -opioid receptors ( $\mu^{\beta\text{gal}}\text{OR}$ ),  $\delta^{\beta\text{gal}}$ -opioid receptors ( $\delta^{\beta\text{gal}}\text{OR}$ ), or  $\mu^{\beta\text{gal}}\text{OR}-\delta\text{OR}$ . (A and B) Schematic of homomer-mediated  $\beta$ -arrestin recruitment. Treatment of cells expressing either (A)  $\mu\text{OR}$  or (B)  $\delta\text{OR}$  tagged with ProLink/ $\beta$ -gal donor (PK;  $\mu^{\beta\text{gal}}\text{OR}$  or  $\delta^{\beta\text{gal}}\text{OR}$ , respectively) and  $\beta$ -arrestin tagged with a  $\beta$ -gal activator (EA) with receptor-selective agonists leads to recruitment of  $\beta$ -arrestin to the receptor and reconstitution of a functionally active  $\beta$ -gal, with activity that can be measured by the addition of an enzyme-specific substrate. (C) Schematic of heteromer-mediated  $\beta$ -arrestin recruitment. Treatment of cells expressing untagged  $\delta\text{OR}$ ,  $\mu\text{OR}$  tagged with PK ( $\mu^{\beta\text{gal}}\text{OR}-\delta\text{OR}$ ), and  $\beta$ -arrestin tagged with EA with a  $\delta\text{OR}$ -selective agonist leads to recruitment of  $\beta$ -arrestin to  $\mu\text{OR}$  and reconstitution of a functionally active  $\beta$ -gal, with activity that can be measured by addition of an enzyme-specific substrate. (D and E) Cells expressing  $\mu^{\beta\text{gal}}\text{OR}$ ,  $\delta^{\beta\text{gal}}\text{OR}$ , or  $\mu^{\beta\text{gal}}\text{OR}-\delta\text{OR}$  ( $2 \times 10^5$  cells) were incubated with either (D) [ $^3\text{H}$ ]DAMGO ([D-Ala<sup>2</sup>, N-MePhe<sup>4</sup>, Gly-o<sup>1</sup>]-enkephalin) or (E) [ $^3\text{H}$ ]deltorphin II ([ $^3\text{H}$ ]Delt II; 0–10 nM final concentration) as described in *Materials and Methods*. Nonspecific binding was determined in the presence of 10  $\mu\text{M}$  diprenorphine and was less than 10% of the total binding. (F and G) Cells expressing  $\mu^{\beta\text{gal}}\text{OR}$ ,  $\delta^{\beta\text{gal}}\text{OR}$ , or  $\mu^{\beta\text{gal}}\text{OR}-\delta\text{OR}$  ( $2 \times 10^5$  cells) were incubated with (F) [ $^3\text{H}$ ]Delt II (6 nM final concentration) in the absence or presence of the  $\mu\text{OR}$  antagonist D-Phe-Cys-Tyr-D-Trp-Orn-Thr-Pen-Thr-NH<sub>2</sub> (CTOP) (10 nM final concentration) or (G) [ $^3\text{H}$ ]DAMGO (10 nM final concentration) in the absence or presence of the  $\delta\text{OR}$  antagonist H-Tyr-Tic[CH<sub>2</sub>NH]-Phe-Phe-OH (TIPP $\psi$ ) (10 nM final concentration) as described in *Materials and Methods*. Nonspecific binding was determined in the presence of 10  $\mu\text{M}$  diprenorphine and was less than 10% of the total binding. (H) Membranes (20  $\mu\text{g}$ ) from cells expressing  $\mu^{\beta\text{gal}}\text{OR}-\delta\text{OR}$  were subjected to a [ $^3\text{S}$ ]GTP $\gamma\text{S}$  binding assay with either DAMGO or Delt II (0–10  $\mu\text{M}$  final concentration) as described in *Materials and Methods*. Results represent mean  $\pm$  SE ( $n = 3$ ).

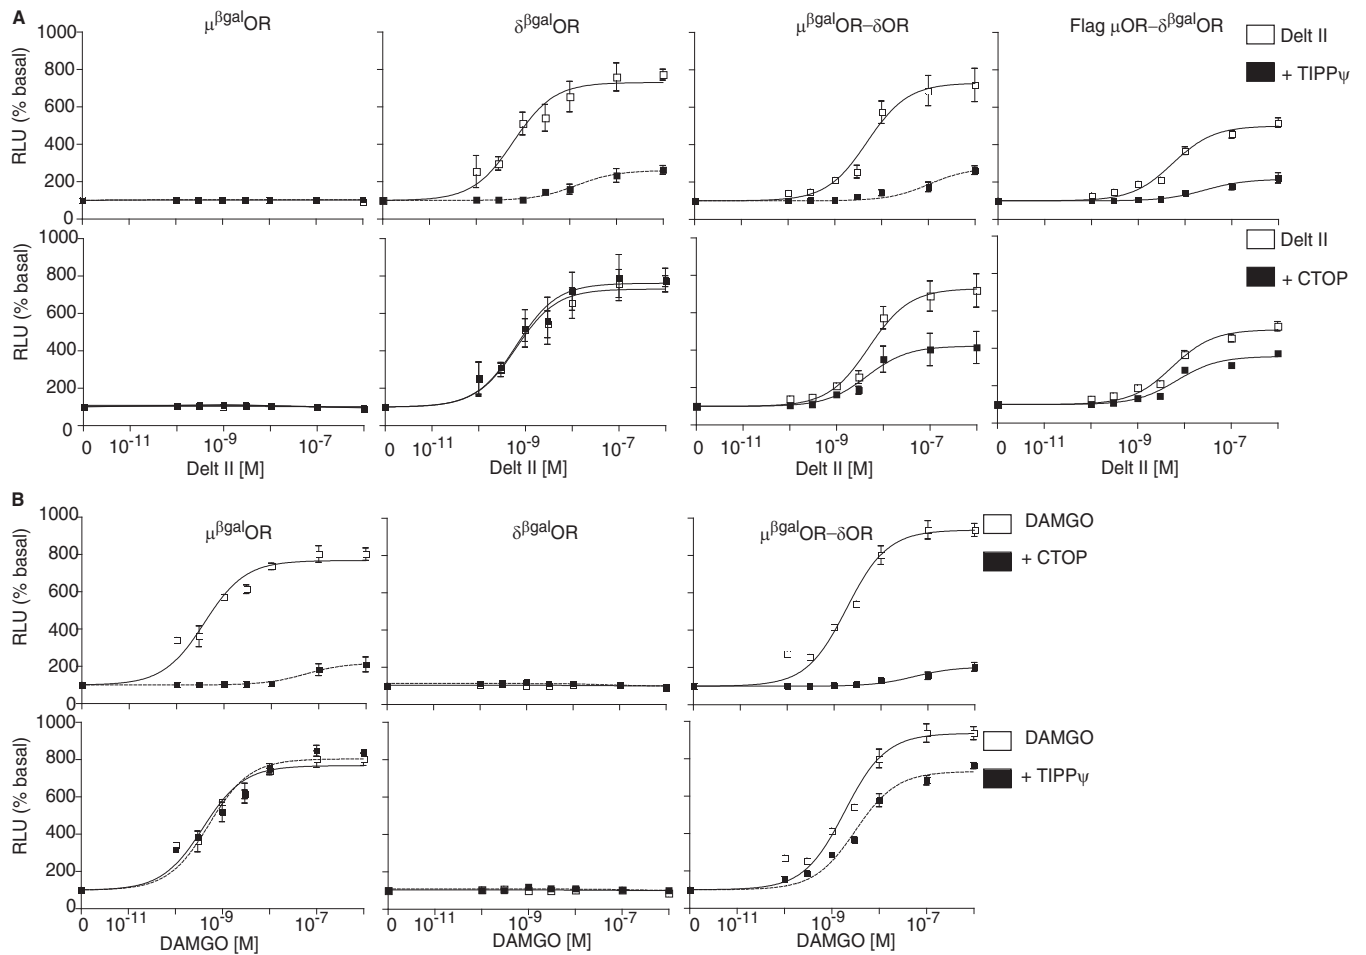

**Fig. S2.** Recruitment of  $\beta$ -arrestin by the  $\delta OR$  agonist Delt II or the  $\mu OR$  agonist DAMGO. (A) Cells expressing  $\mu^{\beta gal}OR$ ,  $\delta^{\beta gal}OR$ ,  $\mu^{\beta gal}OR-\delta OR$ , or Flag  $\mu OR-\delta^{\beta gal}OR$  (20,000 cells/well) were plated into 96-well plates and subjected to a  $\beta$ -arrestin recruitment assay with the  $\delta OR$  agonist Delt II (0–1  $\mu M$  final concentration) in the absence or presence of the  $\delta OR$  antagonist TIPP $\psi$  (10  $\mu M$  final concentration) or the  $\mu OR$  antagonist CTOP (10  $\mu M$  final concentration) as described in *Materials and Methods*. (B) Cells expressing  $\mu^{\beta gal}OR$ ,  $\delta^{\beta gal}OR$ , or  $\mu^{\beta gal}OR-\delta OR$  (20,000 cells/well) were plated into 96-well plates and subjected to a  $\beta$ -arrestin recruitment assay with the  $\mu OR$  agonist DAMGO (0–1  $\mu M$  final concentration) in the absence or presence of either the  $\mu OR$  antagonist CTOP or the  $\delta OR$  antagonist TIPP $\psi$  (10  $\mu M$  final concentration) as described in *Materials and Methods*. Results are mean  $\pm$  SE ( $n = 3$ –6). RLU, relative luminescence unit.

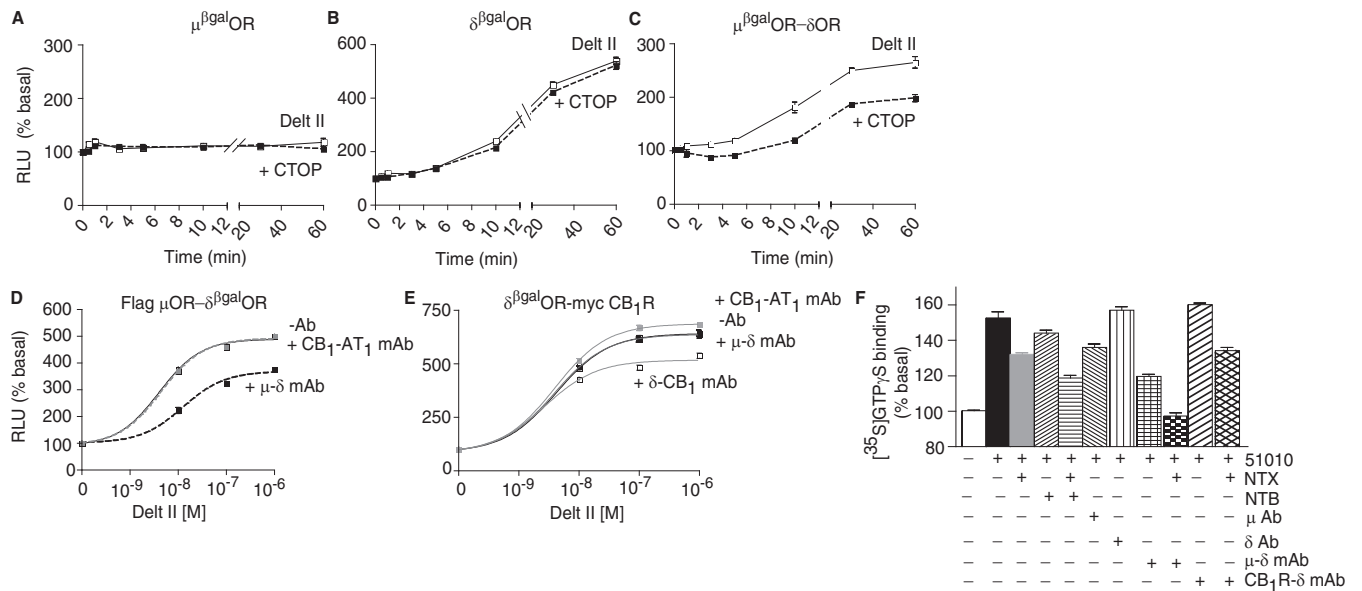

**Fig. S3.** Time course and effect of  $\mu OR-\delta OR$  heteromer-selective antibody on agonist-mediated  $\beta$ -arrestin recruitment. (A–C) Cells expressing (A)  $\mu^{\beta gal}OR$ , (B)  $\delta^{\beta gal}OR$ , or (C)  $\mu^{\beta gal}OR-\delta OR$  were treated with 1  $\mu M$  Delt II in the absence or presence of 100 nM CTOP, and  $\beta$ -arrestin recruitment was measured as described in *Materials and Methods* at indicated time points. (D) Cells expressing Flag  $\mu OR-\delta^{\beta gal}OR$  (20,000/well) were treated with Delt II (0–1  $\mu M$ ) in the absence or presence of  $\mu-\delta$  or CB<sub>1</sub>-AT<sub>1</sub> mAb (1  $\mu g$ /well), and  $\beta$ -arrestin recruitment was measured as described in *Materials and Methods*. (E) Cells expressing  $\delta^{\beta gal}OR-myc CB_1R$  were treated with Delt II (0–1  $\mu M$ ) in the absence or presence of  $\mu-\delta$ ,  $\delta-CB_1$ , or CB<sub>1</sub>-AT<sub>1</sub> mAb (1  $\mu g$ /well), and  $\beta$ -arrestin recruitment was measured as described in *Materials and Methods*. (F) Spinal cord membranes (20  $\mu g$ ) from WT mice were subjected to a [<sup>35</sup>S]GTP $\gamma$ S binding assay with CYM51010 (51010; 1  $\mu M$ ) in the absence or presence of  $\mu OR$  antagonist naltrexone (NTX; 10  $\mu M$ ),  $\delta OR$  antagonist naltriben (NTB; 10  $\mu M$ ),  $\mu$  Ab (1  $\mu g$ ),  $\delta$  Ab (1  $\mu g$ ),  $\mu-\delta$  mAb (1  $\mu g$ )  $\pm$  NTX (10  $\mu M$ ), or CB<sub>1</sub>- $\delta$  mAb (1  $\mu g$ )  $\pm$  NTX (10  $\mu M$ ) as described in *Materials and Methods*. Results represent mean  $\pm$  SE ( $n = 3-6$ ).



were administered i.t. with vehicle, control IgG (anti-Flag IgG; 1  $\mu$ g), or  $\mu$ - $\delta$  mAb (1  $\mu$ g) 30 min before i.t. administration of (F) CYM51010 or (G and H) Mor, and antinociceptive activity was measured as described in *Materials and Methods*. H represents AUC calculated from data in G. (I and J) Mice were administered with either (I) Mor or (J) CYM51010 (10 mg/kg s.c.) one time daily for 8 d, and antinociceptive activity was measured daily as described in *Materials and Methods*. K represents peak antinociception calculated from data in I and J. (L–O) Mice were administered with either (L, N, and O) Mor or (M–O) CYM51010 (6 mg/kg s.c.) one time daily for 14 d, and antinociceptive activity was measured daily as described in *Materials and Methods*. N represents peak antinociception calculated from data in L and M. O represents AUC calculated from data in L and M. Results are mean  $\pm$  SE ( $n = 3$ –15 mice per group). \* $P < 0.05$ ; \*\* $P < 0.01$  as determined by ANOVA followed by multiple comparison tests (Student Newman–Keuls tests) or unpaired  $t$  tests. %MPE, maximum possible effect.

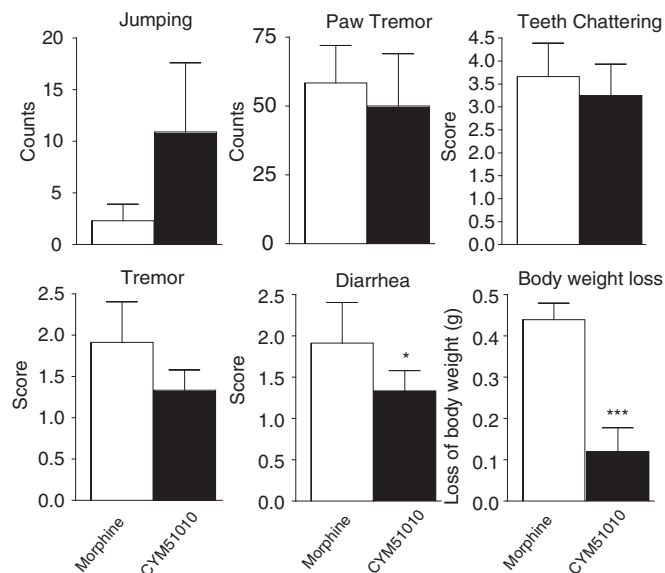

**Fig. S5.** Naloxone precipitated withdrawal after chronic administration of CYM51010. Mice were treated with morphine or CYM51010 (10 mg/kg s.c.) one time per day for 9 d. On the ninth day, mice were administered naloxone (5 mg/kg i.p.) 2 h after the last drug administration. The numbers of jumps, paw tremors, teeth chattering, tremors, diarrhea, and body weight loss as withdrawal signs from seven separate animals. \* $P < 0.05$  vs. morphine (unpaired  $t$  test).

## Other Supporting Information Files

[Table S1 \(DOCX\)](#)

[Table S2 \(DOCX\)](#)

[Table S3 \(DOCX\)](#)

[Table S4 \(DOCX\)](#)
